# Supplementary material for: Identifying Pleiotropic SNPs Associated With Femoral Neck and Heel Bone Mineral Density
Source: Front Genet. 2020 Jul 22;11:772. doi: 10.3389/fgene.2020.00772 (PMC7388689; doi:10.3389/fgene.2020.00772)
Supplement: TABLE S2 — FNK-BMD loci identified with cFDR. [file Table_2.XLSX]

## Sheet: Sheet1
Table S2 FNK-BMD loci identified with cFDR
SNP	chr	Position	Fnction	Gene	P value FNK-BMD	P value eBMD	cFDR eBMD | FNK-BMD	cFDR FNK-BMD | eBMD
rs10037512	5	88354675	ncRNA_intronic	MEF2C-AS1	1.23e-24	0.0013	0.0013	5.54e-20
rs6894139	5	88327782	ncRNA_exonic	MEF2C-AS1	1.43e-23	0.0023	0.0023	3.86e-19
rs7728694	5	88288341	ncRNA_intronic	MEF2C-AS1	9.35e-22	0.0016	0.0024	2.24e-17
rs6426749	1	22711473	intergenic	MIR4418(dist=118680),ZBTB40(dist=66871)	5.9e-16	4.6e-150	1.84e-149	2.66e-14
rs13390528	2	166582031	intergenic	CSRNP3(dist=36114),GALNT3(dist=22282)	2.15e-14	0.0071	0.0071	3.52e-10
rs62259232	3	41112656	intergenic	ZNF621(dist=531371),CTNNB1(dist=128259)	6.71e-14	4.5e-144	1.35e-143	1.71e-12
rs6772565	3	41157267	intergenic	ZNF621(dist=575982),CTNNB1(dist=83648)	2.88e-12	1.5e-140	3.5e-140	5.09e-11
rs2026749	1	68653489	ncRNA_intronic	GNG12-AS1	5.39e-12	1.1e-72	2.2e-72	3.02e-10
rs9478217	6	151874122	intronic	CCDC170	1.23e-11	7.0E-328	0	2.46e-11
rs4422806	8	120022768	intronic	COLEC10	1.23e-11	6.5e-11	1.08e-10	1.05e-08
rs4424296	8	120013276	intronic	COLEC10	1.64e-11	6.6e-11	1.04e-10	1.2e-08
rs1905779	8	120041165	intronic	COLEC10	2.32e-11	6.8e-11	1.02e-10	1.49e-08
rs10955908	8	119904557	intergenic	SAMD12-AS1(dist=166251),TNFRSF11B(dist=31239)	5.58e-11	0.0046	0.00498333	3.22e-07
rs7554551	1	68665023	ncRNA_intronic	GNG12-AS1	6e-11	3.8e-40	8.87e-40	6.72e-09
rs11992136	8	120003727	intronic	COLEC10	8.33e-11	1.1e-05	1.65e-05	1.39e-07
rs13430211	2	166622598	intronic	GALNT3	1.02e-10	0.0065	0.00693333	5.38e-07
rs8047501	16	392318	intronic	AXIN1	1.11e-10	2e-37	4.86e-37	1.21e-08
rs4403440	8	120031575	intronic	COLEC10	1.33e-10	2.6e-09	4.25e-09	8.25e-08
rs1485310	8	120051656	intronic	COLEC10	1.51e-10	5.5e-09	8.71e-09	9.16e-08
rs11800051	1	22695412	intergenic	MIR4418(dist=102619),ZBTB40(dist=82932)	2.26e-10	5.1e-125	2.04e-124	3.25e-09
rs777356	2	166555552	intergenic	CSRNP3(dist=9635),GALNT3(dist=48761)	2.48e-10	0.013	0.013	1.25e-06
rs2055101	8	119886923	intergenic	SAMD12-AS1(dist=148617),TNFRSF11B(dist=48873)	2.49e-10	0.00031	0.000454667	5.12e-07
rs12199746	6	151896523	intronic	CCDC170	3.6e-10	1.2E-340	0	5.4e-10
rs10872673	6	151855593	intronic	CCDC170	4.34e-10	5.6e-295	4.48e-294	2.46e-09
rs12602890	17	41793265	intergenic	MEOX1(dist=54003),SOST(dist=37834)	1.95e-09	8.9e-102	2.78e-101	2.73e-08
rs144691710	17	41819562	intergenic	MEOX1(dist=80300),SOST(dist=11537)	2.88e-09	3.4e-113	1.11e-112	3.2e-08
rs6964260	7	96194571	intronic	SEM1	2.9e-09	1.4e-50	3.44e-50	1.27e-07
rs66838809	17	41798621	intergenic	MEOX1(dist=59359),SOST(dist=32478)	3.15e-09	2.4e-103	7.47e-103	3.89e-08
rs2244812	7	120996240	intronic	FAM3C	1.07e-08	1.5E-515	0	3.57e-08
rs3134063	8	119959657	intronic	TNFRSF11B	1.13e-08	0.19	0.19	0.000190692
rs12950756	17	41904372	intronic	MPP3	1.51e-08	3.7e-93	9.56e-93	1.61e-07
rs34814687	17	41862277	downstream	C17orf105(dist=223)	1.75e-08	5.2e-97	1.39e-96	1.71e-07
rs10464592	7	96230686	intronic	SEM1	2.35e-08	4e-80	9.71e-80	3.06e-07
rs11023687	11	15715050	intronic	LOC102724957	2.63e-08	0.11	0.116667	0.000282297
rs10474292	5	88481215	ncRNA_intronic	MEF2C-AS1	3.14e-08	0.025	0.0272727	0.000140133
rs1785493	11	68208345	intronic	LRP5	4.06e-08	4e-67	9.25e-67	6.95e-07
rs7807894	7	121028340	intronic	FAM3C	4.15e-08	7.1E-469	0	1.14e-07
rs7481672	11	15690737	intronic	LOC102724957	4.9e-08	0.14	0.147568	0.000548265
rs72938563	1	68662494	ncRNA_intronic	GNG12-AS1	8.84e-08	1.1e-33	2.1e-33	3.8e-06
rs4595506	11	16542089	intergenic	SOX6(dist=44154),C11orf58(dist=218059)	2.08e-07	6.2e-37	1.27e-36	7.85e-06
rs1113136	7	38130659	intergenic	EPDR1(dist=139117),STARD3NL(dist=87149)	2.69e-07	2.3e-221	1.69e-220	1.17e-06
rs10799749	1	22734591	intergenic	MIR4418(dist=141798),ZBTB40(dist=43753)	3.98e-07	4.4e-109	1.69e-108	3.18e-06
rs4132568	7	96134981	intronic	SEM1	4.25e-07	3.2e-67	7.92e-67	6.06e-06
rs7780230	7	96270586	intronic	SEM1	4.33e-07	1.6e-37	3.41e-37	1.43e-05
rs3020333	6	152010254	intergenic	CCDC170(dist=67926),ESR1(dist=1377)	4.9e-07	4.0E-369	0	6.53e-07
rs12704870	7	96331727	intronic	SEM1	5.45e-07	5.6e-76	1.5e-75	5.97e-06
rs12704868	7	96261472	intronic	SEM1	5.68e-07	4.2e-80	1.15e-79	5.47e-06
rs2510392	11	68394457	intergenic	PPP6R3(dist=11656),GAL(dist=57486)	7.02e-07	5.3e-64	1.17e-63	8.78e-06
rs477289	1	172191394	intronic	DNM3	7.78e-07	4.4e-34	7.92e-34	2.31e-05
rs2156463	11	68386311	intergenic	PPP6R3(dist=3510),GAL(dist=65632)	7.84e-07	8.1e-65	1.86e-64	9.54e-06
rs4591859	6	151943639	intergenic	CCDC170(dist=1311),ESR1(dist=67992)	8.09e-07	6.7e-220	4.69e-219	2.73e-06
rs497847	17	42105739	intergenic	TMEM101(dist=5220),LSM12(dist=6264)	8.61e-07	6.3e-16	1.06e-15	6.94e-05
rs7119422	11	68331154	intronic	PPP6R3	9.83e-07	3.6e-66	8.35e-66	1.11e-05
rs1201557	11	68226294	intergenic	LRP5(dist=9551),PPP6R3(dist=1892)	1.07e-06	1.1e-67	2.82e-67	1.23e-05
rs4776341	15	67414911	intronic	SMAD3	1.07e-06	1.3e-42	2.6e-42	2.15e-05
rs34435227	16	1533220	intergenic	CLCN7(dist=8135),PTX4(dist=2720)	1.09e-06	2.7e-14	4.33e-14	9.23e-05
rs2745112	16	1526817	intergenic	CLCN7(dist=1732),PTX4(dist=9123)	1.11e-06	3.8e-11	6.04e-11	0.000139661
rs12226585	11	68257861	intronic	PPP6R3	1.15e-06	2.4e-66	5.91e-66	1.24e-05
rs7816021	8	72377054	intergenic	EYA1(dist=102587),MSC(dist=376723)	1.15e-06	2.5e-06	3.5e-06	0.000341675
rs2566759	1	68631792	ncRNA_intronic	GNG12-AS1	1.24e-06	4.7e-36	8.49e-36	2.85e-05
rs1876001	16	49877939	intronic	ZNF423	1.25e-06	3.4e-13	5.47e-13	0.000111128
rs10280461	7	38149932	intergenic	EPDR1(dist=158390),STARD3NL(dist=67876)	1.28e-06	8.2e-149	5.49e-148	5.89e-06
rs2269908	17	42294198	intronic	UBTF	1.66e-06	8e-21	1.36e-20	7.55e-05
rs4263799	8	72394991	intergenic	EYA1(dist=120524),MSC(dist=358786)	1.97e-06	5.3e-06	7.17e-06	0.000582038
rs1381635	4	88587359	intergenic	DMP1(dist=1847),IBSP(dist=133343)	2.15e-06	3.9e-07	5.54e-07	0.000472785
rs4712613	6	21378155	intergenic	CDKAL1(dist=145521),LINC00581(dist=108137)	2.25e-06	5.7e-12	9.33e-12	0.000222034
rs6561055	13	43062379	intergenic	LINC02341(dist=2287),TNFSF11(dist=74493)	2.34e-06	2.9e-40	6.42e-40	4.74e-05
rs8001611	13	42965694	intergenic	AKAP11(dist=68291),LINC02341(dist=33334)	3.3e-06	4.4e-152	3.72e-151	1.61e-05
rs7317323	13	42957489	intergenic	AKAP11(dist=60086),LINC02341(dist=41539)	3.41e-06	6e-31	1.1e-30	8.32e-05
rs17834325	17	2037839	intronic	SMG6	3.43e-06	4.1e-28	7.44e-28	9.39e-05
rs79676715	4	88860123	intergenic	MEPE(dist=92155),SPP1(dist=36679)	3.54e-06	9.2e-08	1.34e-07	0.000610618
rs77718124	16	51028009	intergenic	LINC02168(dist=186469),LINC02127(dist=23660)	4.51e-06	4.7e-34	9.51e-34	9.81e-05
rs2118610	15	67428334	intronic	SMAD3	4.59e-06	4.3e-43	1.09e-42	8.22e-05
rs112538532	13	42999170	ncRNA_intronic	LINC02341	4.86e-06	9.2e-40	2.11e-39	9.02e-05
rs2116047	1	68661751	ncRNA_intronic	GNG12-AS1	5.47e-06	5.1e-23	9.33e-23	0.000181907
rs508742	1	172175115	intronic	DNM3	6.05e-06	6.7e-37	1.47e-36	0.000117163
rs6557156	6	151912703	intronic	CCDC170	6.11e-06	4.4e-300	6.67e-299	1.43e-05
rs9533090	13	42951449	intergenic	AKAP11(dist=54046),LINC02341(dist=47579)	6.19e-06	3.9e-147	2.76e-146	2.29e-05
rs9648061	7	38154542	intergenic	EPDR1(dist=163000),STARD3NL(dist=63266)	6.41e-06	4.5e-166	4.19e-165	2.56e-05
rs1367868	9	133471587	intronic	FUBP3	7.38e-06	2.9e-28	5.57e-28	0.000172544
rs11209223	1	68601148	ncRNA_intronic	GNG12-AS1	7.43e-06	2.1e-35	4.43e-35	0.00013794
rs4394609	1	22732518	intergenic	MIR4418(dist=139725),ZBTB40(dist=45826)	7.51e-06	2.8e-72	9.8e-72	6.09e-05
rs408277	3	41100200	intergenic	ZNF621(dist=518915),CTNNB1(dist=140715)	8.13e-06	3.4e-75	1.25e-74	6.41e-05
rs1949481	11	16259405	intronic	SOX6	8.92e-06	5.5e-14	9.6e-14	0.000502544
rs34264442	13	43043307	ncRNA_intronic	LINC02341	8.99e-06	1.1e-39	2.66e-39	0.000144467
rs17130557	1	68654069	ncRNA_intronic	GNG12-AS1	1.11e-05	1.2e-38	3.03e-38	0.000182141
rs78590462	4	1015204	intronic	FGFRL1	1.28e-05	6.9e-88	3.36e-87	7.73e-05
rs10736312	10	124088367	intronic	BTBD16	1.29e-05	4.9e-15	9.56e-15	0.00063358
rs6682619	1	22690923	intergenic	MIR4418(dist=98130),ZBTB40(dist=87421)	1.43e-05	4.5e-19	9.23e-19	0.000493827
rs2952565	7	121017812	intronic	FAM3C	1.49e-05	3.8e-254	6.03e-253	3.54e-05
rs2724058	7	96094480	intergenic	SLC25A13(dist=143021),SEM1(dist=16458)	1.61e-05	4.8e-22	1.05e-21	0.000446238
rs188239285	4	863579	intronic	GAK	1.76e-05	4.4e-24	1.01e-23	0.000437912
rs7936582	11	68292930	intronic	PPP6R3	1.82e-05	4.3e-58	1.52e-57	0.000174533
rs2235811	20	10644158	intronic	JAG1	1.83e-05	2.1e-68	9.19e-68	0.000148116
rs35582899	17	69936896	intergenic	CASC17(dist=738576),LINC02095(dist=81096)	2.07e-05	2.5e-22	5.83e-22	0.000533929
rs1449592	7	96410250	intergenic	SEM1(dist=71047),DLX6-AS1(dist=187577)	2.15e-05	5.2e-36	1.43e-35	0.000330861
rs6905582	6	152000454	intergenic	CCDC170(dist=58126),ESR1(dist=11177)	2.16e-05	1.6e-123	1.26e-122	8.53e-05
rs2931277	17	42172096	intronic	HDAC5	2.83e-05	4.6e-44	1.78e-43	0.000379088
rs17497309	7	96349297	intergenic	SEM1(dist=10094),DLX6-AS1(dist=248530)	2.91e-05	1.2e-29	3.23e-29	0.000515352
rs3136512	11	46760120	intronic	F2	3e-05	7.2e-35	2.1e-34	0.000446897
rs9891640	17	69915353	intergenic	CASC17(dist=717033),LINC02095(dist=102639)	3.06e-05	9.4e-25	2.46e-24	0.000652336
rs3759579	14	103851272	upstream	MARK3(dist=429)	3.31e-05	1.6e-84	1.05e-83	0.0001986
rs7326472	13	42979951	intergenic	AKAP11(dist=82548),LINC02341(dist=19077)	3.35e-05	1.7e-25	4.59e-25	0.0006795
rs59422211	1	22669653	intergenic	MIR4418(dist=76860),ZBTB40(dist=108691)	3.87e-05	1.6e-27	4.49e-27	0.000701221
rs10793951	9	133496529	intronic	FUBP3	3.9e-05	4.9e-41	1.99e-40	0.000538532
rs1415193	6	152092638	intronic	ESR1	3.99e-05	9.7e-209	1.7e-207	0.000105191
rs4654785	1	22491843	intergenic	WNT4(dist=22324),MIR4418(dist=100889)	4.06e-05	3.2e-76	2e-75	0.000268484
rs7937101	11	47226488	intergenic	PACSIN3(dist=18478),DDB2(dist=10005)	4.06e-05	1.7e-71	9.21e-71	0.0002639
rs7560799	2	42305523	intergenic	PKDCC(dist=19855),LOC102723824(dist=64052)	4.41e-05	1.1e-89	8.35e-89	0.000227033
rs13247600	7	120950910	intergenic	CPED1(dist=13412),WNT16(dist=14511)	4.47e-05	1.1e-47	4.77e-47	0.0004917
rs2586404	1	172263074	intronic	DNM3	4.5e-05	3.5e-28	1.03e-27	0.0007325
rs2504069	6	152085517	intronic	ESR1	4.54e-05	1.3e-101	1.11e-100	0.000205208
rs3760229	17	2206114	intronic	SMG6	4.63e-05	2.9e-50	1.27e-49	0.000463945
rs13026066	2	202811972	intergenic	CDK15(dist=51699),FZD7(dist=87338)	4.9e-05	3.7e-31	1.17e-30	0.000700493
rs10769239	11	47130540	intronic	C11orf49	5.05e-05	1.1e-74	7e-74	0.000304403
rs4775932	15	51498539	ncRNA_intronic	MIR4713HG	5.08e-05	9.7e-40	3.8e-39	0.00059238
rs34136735	13	43087742	intergenic	LINC02341(dist=27650),TNFSF11(dist=49130)	5.3e-05	5.9e-39	2.32e-38	0.000618623
rs1893495	18	13759428	intronic	RNMT	5.88e-05	1.6e-93	1.52e-92	0.0002744
rs11653927	17	2012094	intronic	SMG6	6.27e-05	1.1e-34	4.11e-34	0.000757625
rs8098141	18	13739861	intronic	RNMT	6.56e-05	2.6e-49	1.37e-48	0.000637077
rs484686	1	172152202	intronic	DNM3	7.46e-05	5.5e-37	2.39e-36	0.000880725
rs948726	18	13714984	intronic	FAM210A	7.72e-05	5.6e-49	3.18e-48	0.000739955
rs10008869	4	88863231	intergenic	MEPE(dist=95263),SPP1(dist=33571)	8.56e-05	4.8e-45	2.78e-44	0.000874676
rs11972319	7	38034393	intergenic	EPDR1(dist=42851),STARD3NL(dist=183415)	8.62e-05	7.3e-168	1.95e-166	0.00028015
rs398638	3	41075115	intergenic	ZNF621(dist=493830),CTNNB1(dist=165800)	8.72e-05	1.4e-65	9.39e-65	0.000519567
rs12911554	15	51542757	ncRNA_intronic	MIR4713HG	8.89e-05	3.5e-55	2.18e-54	0.000702652
rs7349925	6	151922064	intronic	CCDC170	9.42e-05	2.8e-124	4.48e-123	0.000327457
rs7926413	11	68409890	intergenic	PPP6R3(dist=27089),GAL(dist=42053)	9.45e-05	2e-66	1.43e-65	0.000558957
rs55959044	6	151895020	intronic	CCDC170	0.000102	3.8e-109	5.8e-108	0.0003995
rs4790874	17	1995177	intronic	SMG6	0.000103	7e-51	4.61e-50	0.0008755
rs6715538	2	54847934	intronic	SPTBN1	0.000106	9.6e-90	1.12e-88	0.000453813
rs9287237	1	240597214	intronic	FMN2	0.000147	1.3e-247	6.43e-246	0.000326667
rs852002	6	151963232	intergenic	CCDC170(dist=20904),ESR1(dist=48399)	0.000157	4.4e-105	7.69e-104	0.000628
rs12104083	18	13739269	intronic	RNMT	0.000167	1.3e-94	2.03e-93	0.000631469
rs9478224	6	151909178	intronic	CCDC170	0.000214	3.2e-114	8.12e-113	0.00077575
rs7294671	12	90344695	intergenic	LINC02399(dist=1192),LINC02392(dist=342400)	0.000235	6.4e-120	1.73e-118	0.000783333
rs2982561	6	152052652	intronic	ESR1	0.000258	3.3e-238	2.27e-236	0.0005418
Note: "0.00E+00": p value <1E-300.
